# Supplementary material for: Effect of electrical stimulation on neural regeneration via the p38-RhoA and ERK1/2-Bcl-2 pathways in spinal cord-injured rats
Source: PubMed Central journal article supplement — Neural Regen Res. 2018 Feb;13(2):340–6. doi: 10.4103/1673-5374.226404 (PMC5879908; doi:10.4103/1673-5374.226404), 2018-02
Supplement: NRR-13-340_Suppl1.pdf [file NRR-13-340_Suppl1.pdf]

### **Open peer review report 1**

**Reviewer:** Hojjat Allah Abbaszadeh, Shaheed Beheshti University of Medical Sciences, Iran.

#### **Comments to the authors:**

1. There are some errors in grammar, spelling and typing. The entire of the manuscript needs to be revised.
  2. (BBB chart), it is better that the authors show the results of BBB assay by a line chart.
  3. What was the race and gender of rats used in this study?
  4. Why did you apply ES 4 h for 7 days?
- 

### **Open peer review report 2**

**Reviewer:** Masaaki Hori, Juntendo University School of Medicine, Japan.

**Comments to the authors:** This is interesting and important paper. But I believe there is still room for improvement in discussion.

This paper describes the evaluation of effect of electrical stimulation on neural regeneration via P38-RhoA and ERK1/2-Bcl-2 pathway in spinal cord injured rats.

The work seems to be interesting but some concerns should be clarified before publications.

1. In results, is there any correlation between electrophysiological tests results and western blot analysis results? Please add explain.
2. In discussion, the first paragraph seems to be the repeat of introduction, so it is not needed.
3. In discussion, over all, each result was explained but lack of speculation, e.g. the possible mechanism of your results of the changing and differences among proteins after electrical stimulation. Please add explanation.
4. In discussion, some limitation of this study should be added.
